# Supplementary material for: Development and Validation of the Gene Expression Predictor of High-grade Serous Ovarian Carcinoma Molecular SubTYPE (PrOTYPE)
Source: Oxford University Press journal article supplement (doi:10.1158/1078-0432.ccr-20-0103), 2020-06-17
Supplement: 10780432ccr200103-sup-table_sa1_otta-cohorts_05jul20.xlsx [file 10780432ccr200103-sup-table_sa1_otta-cohorts_05jul20.xlsx]

## Sheet: TABLE SA1-A StudyCohort
TABLE SA1-A
Group	Study Acronym	Study name	Study Type	Dates of accrual	follow up window	study setting	Ascertainment (participant centres)	Location	Study Citation	Samples included	Sample passed QC	% passed QC	Consensus labelled (CL)	% CL
TRAINING	AOC	Australian Ovarian Cancer Study	case-control	2002-2006	2002-2017	primary care and referral centres	Treatment centers throughout Australia; cancer registries serving Queensland, South and West Australia; regular follow- up by medical record review	Australia	A	653	582	0.891	445	0.764605
	AOV	Alberta Ovarian Tumor Types Study	registry	1978-2010	1978-2010	provincial cancer centers	Population-based Alberta Cancer Registry; periodic updates are performed for vital statistics	Canada	B	71	71	1	56	0.788732
	CNI	CNIO Ovarian Cancer Study	cohort	2006-2013	2006-2016	primary care	Hospitals in Madrid in Medical Oncology Divisions	Spain	D	73	73	1	52	0.712329
	DOV	Diseases of the Ovary and their Evaluation	case-control	2002-2009	2002-2018*	population based	13 counties from western Washington SEER registry	US	E & F	779	660	0.847	510	0.772727
	GER	Germany Ovarian Cancer Study	case-control	1993-1996	1993-2009	primary care	Population-based study involving local and local and regional hospitals in Rhein-Neckar-Odenwald and Freiburg. Cases recruited from 26 hospitals in the study regions, and controls identified from population registries	Germany	G	12	11	0.917	9	0.818182
	LAX	Women's Cancer Research Program - Cedars-Sinai Medical Center	cohort	1989-2009	1989-2017	Gynecologic Oncology Clinic	Women's Cancer Program Biorepository	US	H	28	28	1	22	0.785714
	POC	Polish Ovarian Cancer Study	cohort	2000-2003	2000-2016*	primary care	Hospital records and cancer registries serving Szczecin	Poland	I	80	80	1	57	0.7125
	USC	Los Angeles County Case-Control Study of Ovarian Cancer	case-control	1992-2008	1992-2019	primary care	Los Angeles County SEER Program	US	J	45	45	1	40	0.888889
subtotal training										1741	1550	0.890293	1191	0.768387
CONFIRMATION	UKO	United Kingdom Ovarian Cancer Population study	case-control	2006-2010	2006-2016	tertiary centres (cases), UKCTOCS (controls)	Pathologist-reviewed cases from ten major Gynecologic Oncology NHS centres in England, Wales and Northern Ireland; cancer and death registries NHS Information Centre for Health and Social Care (England and Wales) and Central Services Agency (Northern Ireland)	UK	K	128	128	1	102	0.796875
	RTR	SEER residual tissue repository	registry	1983-2004	1983-2012	primary care	Hawaii and Iowa Tumor Registries	US	L	94	82	0.872	72	0.878049
	SEA	Study of Epidemiology and Risk Factors in Cancer Heredity	case-cohort	1998-present	1998-2016*	population based	Eastern Region Cancer Intelligence Unit, West Midlands Cancer Intelligence Unit, and multiple cancer networks	UK	M	248	242	0.976	203	0.838843
	VAN	Vancouver Ovarian Cancer Study	cohort	1982-present	1982-2019*	primary care and provicial cancer centres	Vancouver General, UBC, and BC Cancer Hospitals with outcome data provided the British Columbia cancer registry and the Cheryl Brown Outcomes Unit	Canada	N & O	454	452	0.996	363	0.803097
	WMH	Westmead Hospital, Gynaecological Oncology Biobank (GynBiobank)	cohort	1992-present	1992-2019*	tertiary referral centre	The Crown Princess Mary Cancer Centre and affiliated hospitals	Australia	P	131	128	0.977	97	0.757812
subtotal confirmation										1055	1032	0.978199	837	0.811047
VALIDATION 1	HAW	Hawaii Ovarian Cancer Study	case-control	1993-2008	1993-2018*	primary care	Hawaii Tumor Registry and medical records	US	Q & R	68	64	0.941	55	0.859375
	MAY	Mayo Clinic Ovarian Cancer Study	cohort	2000-2013	2000-2018*	primary care	Mayo Clinic medical records and death certificates	US	S	372	365	0.981	295	0.808219
	NCO	North Carolina	case-control	1999-2007	1999-2016*	population based	Population based study with cases identified though the North Carolina Central Cancer Registry covering 48 counties in North Carolina.	US	T & U	423	421	0.995	334	0.793349
	POL	Polish Ovarian Cancer Case Control Study	case-control	2001-2003	2001-2012	primary care	5 hospitals serving residents of Warsaw and Lodz	Poland	V,W & X	44	44	1	35	0.795455
subtotal validation 1										907	894	0.985667	719	0.804251
VALIDATION 2	BRO	BriTROC-1	clinical trial	2012-2017	2012 - 2018	Cancer Centres	Non-randomised prospective sample collection study in 12 UK Gynaecological Cancer Centres. http://www.crukctuglasgow.org/eng.php?pid=britroc1	UK	C	73	73	1	61	0.835616
	SRF	SCOTROC 4	clinical trial	2004-2009	2004 - 2012	Cancer Centres	SCOTROC 4: A Prospective, 71-centre, Randomised Trial of flat dose vs intra-patient dose escalation single agent carboplatin as first-line chemotherpay for advanced ovarian cancer. NCT00098878	UK & AUS & NZ	Y	152	137	0.901	111	0.810219
	TRI	TRIO 014	clinical trial	2009-2014	2009-2016	Cancer Centres	A randomized, double-blind, placebo controlled, multi-center, Phase II study. NCT00718523	US & Europe	Z	143	143	1	111	0.776224
subtotal validation 2										368	353	0.959239	283	0.8017
FULL COHORT	Total									4071	3829	0.940555	3030	0.791329
*Study and follow up collection is ongoing, dates reported are relevent for this report
Study Citations
A	Merritt MA, Green AC, Nagle CM, Webb PM. Talcum powder, chronic pelvic inflammation and NSAIDs in relation to risk of epithelial ovarian cancer. Int J Cancer. 2008;122:170-6.
B	Kelemen LE, Warren GW, Koziak JM, Köbel M, Steed H. Smoking may modify the association between neoadjuvant chemotherapy and survival from ovarian cancer. Gynecol Oncol. 2016 Jan;140(1):124-30. doi: 10.1016/j.ygyno.2015.11.008. Epub 2015 Nov 5. PMID: 26549109
C	Goranova T, Ennis D, Piskorz AM, Macintyre G, Lewsley LA, Stobo J, et al. Safety and utility of image-guided research biopsies in relapsed high-grade serous ovarian carcinoma-experience of the BriTROC consortium. Br J Cancer. 2017 May 9;116(10):1294-1301.
D	Kamieniak MM, Rico D, Milne RL, Munoz-Repeto I, Ibanez K, Grillo MA, et al. Deletion at 6q24.2-26 predicts longer survival of high-grade serous epithelial ovarian cancer patients. Mol Oncol. 2015;9:422-36.
E	(DOVE) Rossing MA, Cushing-Haugen KL, Wicklund KG, et al. Menopausal hormone therapy and risk of epithelial ovarian cancer. Cancer Epidemiol Biomarkers Prev 2007; 16: 2548-56.
F	(DOVE2) Bodelon C, Cushing-Haugen KL, Wicklund KG, et al. Sun exposure and risk of epithelial ovarian cancer. Cancer Causes and Control 2012; 23(12): 1985-94.
G	Peterlongo P, Chang-Claude J, Moysich KB, Rudolph A, Schmutzler RK, Simard J, et al. Candidate genetic modifiers for breast and ovarian cancer risk in BRCA1 and BRCA2 mutation carriers. Cancer Epidemiol Biomarkers Prev. 2015;24:308-16.
H	Ramus SJ, Antoniou AC, Kuchenbaecker KB, Soucy P, Beesley J, Chen X, et al. Ovarian cancer susceptibility alleles and risk of ovarian cancer in BRCA1 and BRCA2 mutation carriers. Hum Mutat. 2012;33:690-702.
I	Garcia-Closas M, Brinton LA, Lissowska J, Richesson D, Sherman ME, Szeszenia-Dabrowska N, et al. Ovarian cancer risk and common variation in the sex hormonebinding globulin gene: a population-based case-control study. BMC cancer. 2007;7:60..
J	Wu AH, Pearce CL, Tseng CC, Pike MC. African Americans and Hispanics Remain at Lower Risk of Ovarian Cancer Than Non-Hispanic Whites after Considering Nongenetic Risk Factors and Oophorectomy Rates. Cancer Epidemiol Biomarkers Prev. 2015 Jul;24(7):1094-100.
K	Balogun N, Gentry-Maharaj A, Wozniak EL, Lim A, Ryan A, Ramus SJ, et al. Recruitment of newly diagnosed ovarian cancer patients proved challenging in a multicentre biobanking study. J Clin Epidemiol. 2011;64:525-30.
L	Anderson WF, Luo S, Chatterjee N, Rosenberg PS, et al. Human epidermal growth factor receptor-2 and estrogen receptor expression, a demonstration project using the residual tissue repository of the Surveillance, Epidemiology, and End Results (SEER) program. Breast Cancer Res Treat. 2009 Jan;113(1):189-96.
M	Song H, Ramus SJ, Quaye L, Dicioccio RA, Tyrer J, Lomas E, et al. Common variants in mismatch repair genes and risk of invasive ovarian cancer. Carcinogenesis. 2006;27:2235-42.
N	Prentice LM, Klausen C, Kalloger S, Kobel M, McKinney S, Santos JL, et al. Kisspeptin and GPR54 immunoreactivity in a cohort of 518 patients defines favourable prognosis and clear cell subtype in ovarian carcinoma. BMC Med. 2007;5:33
O	Kobel M, Reuss A, Bois A, Kommoss S, Kommoss F, Gao D, et al. The biological and clinical value of p53 expression in pelvic high-grade serous carcinomas. J Pathol. 2010;222:191-8.
P	Emmanuel C, Chiew YE, George J, Etemadmoghadam D, Anglesio MS, Sharma R, et al. Genomic classification of serous ovarian cancer with adjacent borderline differentiates RAS pathway and TP53-mutant tumors and identifies NRAS as an oncogenic driver. Clin Cancer Res. 2014;20:6618-30.
Q	Goodman MT, Lurie G, Thompson PJ, McDuffie KE, Carney ME. Association of two common single-nucleotide polymorphisms in the CYP19A1 locus and ovarian cancer risk. Endocr Relat Cancer. 2008;15:1055-60.
R	Lurie G, Wilkens LR, Thompson PJ, McDuffie KE, Carney ME, Terada KY, et al. Genetic polymorphisms in the Paraoxonase 1 gene and risk of ovarian epithelial carcinoma. Cancer Epidemiol Biomarkers Prev. 2008;17:2070-7.
S	Goode EL, Chenevix-Trench G, Hartmann LC, Fridley BL, Kalli KR, Vierkant RA, et al. Assessment of hepatocyte growth factor in ovarian cancer mortality. Cancer Epidemiol Biomarkers Prev. 2011;20:1638-48.
T	Schildkraut JM, Moorman PG, Bland AE, Halabi S, Calingaert B, Whitaker R, Lee PS, Elkins-Williams T, Bentley RC, Marks JR, Berchuck A. Cyclin E overexpression in epithelial ovarian cancer characterizes an etiologic subgroup. Cancer Epidemiology Biomarkers and Prevention 2008; 17: 585-593.
U	Schildkraut JM, Iversen ES, Wilson MA, Clyde MA, Moorman PG, Palmieri RT, Whitaker R, Bentley RC, Marks JR, Berchuck A. Association between DNA damage response and repair genes and risk of invasive serous ovarian cancer. PLoS One. 2010;5(4):e10061. PMCID:PMC2851649.
V	Felix AS1, Sherman ME2, Hewitt SM, et al. Cell-cycle protein expression in a population-based study of ovarian and endometrial cancers. Front Oncol. 2015 Feb 9;5:25. doi: 10.3389/fonc.2015.00025.
W	Yang HP, Murphy KR, Pfeiffer RM, et al. Lifetime Number of Ovulatory Cycles and Risks of Ovarian and Endometrial Cancer Among Postmenopausal Women. Am J Epidemiol. 2016 May 1;183(9):800-14.
X	Garcia-Closas M, Brinton LA, Lissowska J, et al. Ovarian cancer risk and common variation in the sex hormone-binding globulin gene: a population-based case-control study. BMC Cancer20077:60
Y	Banerjee S, Rustin G, Paul J, Williams C, et al. A multicenter, randomized trial of flat dosing versus intrapatient dose escalation of single-agent carboplatin as first-line chemotherapy for advanced ovarian cancer: an SGCTG (SCOTROC 4) and ANZGOG study on behalf of GCIG. Ann Oncol. 2013 Mar;24(3):679-87.
Z	Konecny GE, Haluska P, Janicke F, et al. A phase II, multicenter, randomized, double-blind, placebo-controlled trial of ganitumab or placebo in combination with carboplatin/paclitaxel as front-line therapy for optimally debulked primary ovarian cancer: The TRIO14 trial. Journal of Clinical Oncology 32, no. 15_suppl (May 20 2014) 5529-5529.

## Sheet: TABLE SA1-B REB-IRB
TABLE SA1-B
Study	Ethics committee	Informed consent
AOC	Peter MacCallum Cancer Centre Human Research Ethics Committee	Yes
AOV	Alberta Health Services, Research Ethics	No / pathology material*
BRO	Cambridge Central Research Ethics Committee (Reference 12/EE/0349)	Yes
CNI	Bioethics and Animal Welfare Committee of the Carlos III Health Institute	Yes
DOV	Fred Hutchinson Cancer Research Center Institutional Review Board	Yes
GER	Ethics Committee of the Heidelberg University Clinic	Yes
LAX	Institutional Review Board 3 of Cedars-Sinai Medical Center	Yes
POC	Bioethical Committee of Pomeranian Medical University	Yes
USC	Institutional Review Board Health Research Association and Institutional Review Board University of Southern California School of Medicine	Yes
UKO	National Health Service Central Office for Research Ethics Committees (COREC) and The Joint University College London/University College London Hospital Committee on the Ethics of Human Research (Committee A)	Yes
RTR	Exempt according to OHSR determination	No / pathology material*
SEA	Cambridgeshire 4 Research Ethics Committee	Yes
VAN	University of British Columbia - British Columbia Cancer Agency Research Ethics Board	Yes
WMH	Western Sydney Local Health District, Human Research Ethics Committee	Yes
HAW	University of Hawaii, Committee on Human Studies	Yes
MAY	Institutional Review Board of Mayo Clinic	Yes
NCO	The Duke University Health System Institutional Review Board for Clinical Investigations (DUHS IRB)	Yes
POL	US National Cancer Institute special studies institutional review board, the M. Sklodowska Curie Institute of Oncology and Cancer Center in Warsaw, and the Institute of Occupational Medicine in Lodz	Yes
SRF	UK ethics committee (MREC). An independent data monitoring committee (DMC) reviewed the interim outcome and safety analyses.	Yes
TRI	The UCLA Institutional Review Board	Yes
*In cases without direct informed consent contributing studies obtained local IRB/REB-approved waiver of consent allowing use of the study material.
