# Supplementary material for: Development and Validation of the Gene Expression Predictor of High-grade Serous Ovarian Carcinoma Molecular SubTYPE (PrOTYPE)
Source: Oxford University Press journal article supplement (doi:10.1158/1078-0432.ccr-20-0103), 2020-06-17
Supplement: 10780432ccr200103-sup-table_sb1_arraycohorts_05jul20.xlsx [file 10780432ccr200103-sup-table_sb1_arraycohorts_05jul20.xlsx]

## Sheet: Table SB1
Table SB1
COHORT					INCLUDED (HGSC* in Group 1 and 2)				EXCLUDED				Group 3 (potential overlap with NanoString)**			STUDY DETAIL
GEO or ArrayExpress ID	Study ID	GROUP	PMID	Total Number of Arrays	High-Stage	Low-Stage	Unknown-Stage	TOTAL	non-HGSC ovarian cancer	Duplicate/Replicate Arrays	Non-tumor	TOTAL	High-Stage	Low-Stage	TOTAL	Project Title	Population	Array Platform	Grade	Stage	OS	DFS	Tumor Site	Age	Micro-dissection
GSE6008	Hendrix2006	1	16452189	103	42	0	0	42	57	0	4	61	0	0	0	Human ovarian tumors and normal ovaries	Primary ovarian epithelial adenocarcinomas from University of Michigan-affiliated research sites and hospitals	U133A	Yes	Yes	No	No	No	No	No
E-MEXP-1085	Jochumsen2009	1	19823056	43	0	0	43	43	0	0	0	0	0	0	0	Transcription profiling of human ovarian tumors from MALOVA	Ovarian Cancer from Denmark (MALignant OVArian cancer study)	U133P2	No	No	No	No	No	No	No
GSE30161	Ferriss2012	1	22348014	58	47	0	0	47	11	0	0	11	0	0	0	Genomic Multivariate Predictors of Response to Adjuvant Chemotherapy in Ovarian Carcinoma: Predicting Platinum Resistance	University of Virginia Cancer Registry and Biorepository Tissue Research Facility (1995 - 2004)	U133P2	Yes	Yes	Yes	Yes	No	Yes	No
GSE18520	Mok2009	1	19962670	63	53	0	0	53	10	0	0	10	0	0	0	Whole-genome oligonucleotide expression analysis of papillary serous ovarian adenocarcinomas	Brigham and Women's Hospital (1990 - 2000)	U133P2	Yes	Yes	Yes	No	No	No	Yes
GSE20565	Meyniel2010	1	20492709	140	58	0	2	60	80	0	0	80	0	0	0	Primary and secondary ovarian tumors	Patients who had previously been diagnosed with breast cancer	U133P2	Yes	Yes	No	No	No	No	No
GSE62873	Zsiros2015	1	25712684	63	63	0	0	63	0	0	0	0	0	0	0	Late stage ovarian cancer gene expression profiles	University of Turin, Italy	Gene st1.0	No	Yes	No	No	Yes	No	No
GSE26193	Mateescu2011	2	22101765	107	65	0	0	65	42	0	0	42	0	0	0	Control of oxidative stress by miRNA and impact on ovarian tumorigenesis	Institute Curie (1989 - 2005)	U133P2	Yes	Yes	Yes	Yes	Yes	No	No
GSE14764	Denkert2009	1	19294737	80	67	0	0	67	13	0	0	13	0	0	0	A Prognostic Gene Expression Index in Ovarian Cancer	Tumor Bank Ovarian Cancer Network (TOC); 7 hospitals around Europe	U133A	Yes	Yes	Yes	Yes	No	No	No
GSE63885	Lisowska2014	2	24478986	101	75	0	3	78	23	0	0	23	0	0	0	Gene expression profiling in ovarian cancer	Maria Skłodowska-Curie Memorial Cancer Center/Institute of Oncology in Warsaw,Poland	U133P2	Yes	Yes	Yes	Yes	No	No	No
GSE3149	Bild2006	1	16273092	146	122	0	12	134	12	0	0	12	0	0	0	Duke Cohort	Duke University Medical Center and H. Lee Moffitt Cancer Center and Research Institute	U133A	Yes	Yes	Yes	No	No	Yes	No
GSE2109	IGC-expO2015	1	---	253	91	0	46	137	116	0	0	116	0	0	0	Expression Project for Oncology (expO)	Various (http://www.intgen.org/)	U133P2	Yes	Yes	No	No	Yes	Yes	No
GSE9891	Tothill2008	1	18698038	285	150	6	1	157	53	0	0	53	65	10	75	Expression profile of 285 ovarian tumor samples	Australian Ovarian Cancer Study (1992 - 2006)	U133P2	Yes	Yes	Yes	Yes	Yes	Yes	No
GSE26712	Bonome2008	2	18593951	195	185	0	0	185	0	0	10	10	0	0	0	A Gene Signature Predicting for Survival in Suboptimally Debulked Patients with Ovarian Cancer	Memorial Sloan-Kettering (1990-2003)	U133A	Yes	Yes	Yes	No	No	No	No
TCGA	TCGA2011	1	21720365	593	464	38	17	519	26	17	8	51	21	2	23	The Cancer Genome Atlas	Cancer Centers across North America	HT-U133A	Yes	Yes	Yes	Yes	No	Yes	No
Total				2230	1482	44	124	1650	443	17	22	482	86	12	98
* HGSC Equivalent based on curation of diagnosis, stage and grade information. See Supplemental A1
** Of 98 samples with available data overlapping the array and NanoString cohorts only 86 samples were available with published Molecular Subtype labels. All 12 samples without lables are a subset of the TCGA data cohort.
