# Supplementary material for: Development and Validation of the Gene Expression Predictor of High-grade Serous Ovarian Carcinoma Molecular SubTYPE (PrOTYPE)
Source: Oxford University Press journal article supplement (doi:10.1158/1078-0432.ccr-20-0103), 2020-06-17
Supplement: 10780432ccr200103-sup-table_sb4_subtype3-c5_pro_05jul20.xlsx [file 10780432ccr200103-sup-table_sb4_subtype3-c5_pro_05jul20.xlsx]

## Sheet: Upregulated Genes
Table_SB4-A_Subtype3-C5.PRO
Probe	Gene	Fold Change	q-value(%)
221016_s_at	TCF7L1	2.71332768910561	0
213492_at	COL2A1	2.60866954952458	0
212850_s_at	LRP4	2.58957898170569	0
204724_s_at	COL9A3	2.51093175447924	0
205347_s_at	TMSB15A	2.49585313538877	0
208025_s_at	HMGA2	2.35914571095929	0
204914_s_at	SOX11	2.33835947248509	0
205122_at	TMEFF1	2.22195721069283	0
217897_at	FXYD6	2.21460385629838	0
204400_at	EFS	2.19494310935447	0
205471_s_at	DACH1	2.18547048403345	0
214761_at	ZNF423	2.17373862263919	0
203184_at	FBN2	2.15389209345827	0
202016_at	MEST	2.14498710307135	0
210220_at	FZD2	2.10915851386801	0
221004_s_at	ITM2C	2.09678264485067	0
211071_s_at	MLLT11	2.05157947552031	0
214051_at	TMSB15B	2.03556434166457	0
218332_at	BEX1	2.005756702606	0
209220_at	GPC3	1.94686001283181	0
218974_at	SOBP	1.90693588469928	0
202965_s_at	CAPN6	1.85166012018266	0
209590_at	BMP7	1.8384327652176	0
203417_at	MFAP2	1.82465218655745	0
219250_s_at	FLRT3	1.8209602220412	0
209757_s_at	MYCN	1.81885816178847	0
203849_s_at	KIF1A	1.79834052318943	0
221958_s_at	WLS	1.79057145272649	0
203304_at	BAMBI	1.77868818445236	0
218888_s_at	NETO2	1.73676809558627	0
209560_s_at	DLK1	1.71515328851588	0
205932_s_at	MSX1	1.71025396620672	0
216623_x_at	TOX3	1.70355485815627	0
207030_s_at	CSRP2	1.69681089553104	0
206404_at	FGF9	1.68814076104593	0
210393_at	LGR5	1.66603371716766	0
204379_s_at	FGFR3	1.66110831783176	0
203895_at	PLCB4	1.64504663261902	0
207828_s_at	CENPF	1.63132006095007	0
202554_s_at	GSTM3	1.62950281798726	0
204686_at	IRS1	1.62861497919902	0
206857_s_at	FKBP1B	1.62404184965094	0
203819_s_at	MALSU1	1.62316367099847	0
220167_s_at	TP53TG3	1.61402937219935	0
202242_at	TSPAN7	1.60976975282242	0
204529_s_at	TOX	1.60480975553584	0
203256_at	CDH3	1.59861303565207	0
206172_at	IL13RA2	1.59689316948569	0
205229_s_at	COCH	1.56441100131433	0
201387_s_at	UCHL1	1.55380009225923	0
218847_at	IGF2BP2	1.54563088902007	0
202975_s_at	RHOBTB3	1.53823472378556	0
200884_at	CKB	1.53725701277845	0
204011_at	SPRY2	1.52735415064042	0
204146_at	RAD51AP1	1.5194017831023	0
220085_at	HELLS	1.50452766612401	0
215783_s_at	ALPL	1.50277386115222	0
219873_at	COLEC11	1.49728121138158	0
211959_at	IGFBP5	1.49183484460001	0
212977_at	ACKR3	1.47164686356466	0
201291_s_at	TOP2A	1.46921876913698	0
209897_s_at	SLIT2	1.46868780469441	0
212713_at	MFAP4	1.46534855744271	0
209035_at	MDK	1.45945001444715	0
213222_at	PLCB1	1.45732532793611	0
211276_at	TCEAL2	1.45356586467933	0
221245_s_at	FZD5	1.45348545900932	0
213622_at	COL9A2	1.45284284263974	0
212158_at	SDC2	1.4516020577065	0
203355_s_at	PSD3	1.45065606110376	0
219410_at	TMEM45A	1.44910533035618	0
206280_at	CDH18	1.44758869014221	0
208937_s_at	ID1	1.44710232463964	0
203697_at	FRZB	1.4469953096231	0
213348_at	CDKN1C	1.44447597323934	0
205186_at	DNALI1	1.44310910661783	0
203889_at	SCG5	1.44107681939878	0
202219_at	SLC6A8	1.44043549418715	0
202363_at	SPOCK1	1.43892278597573	0
206953_s_at	ADGRL2	1.43453404841092	0
209505_at	NR2F2	1.43417563515439	0
213110_s_at	COL4A5	1.43201730107775	0
203560_at	GGH	1.42898474763121	0
203706_s_at	FZD7	1.42494677836017	0
203440_at	CDH2	1.42459414171908	0
219683_at	FZD3	1.42352192061338	0
204641_at	NEK2	1.41771599607655	0
219764_at	FZD10	1.41655086344851	0
202236_s_at	SLC16A1	1.41620375496239	0
218820_at	C14orf132	1.40974522659902	0
202409_at	IGF2	1.40216147861635	0
202149_at	NEDD9	1.40063550588938	0
203130_s_at	KIF5C	1.39511480810116	0
201313_at	ENO2	1.38971051375149	0
219412_at	RAB38	1.3884282371658	0
203423_at	RBP1	1.38789412943748	0
205381_at	LRRC17	1.3852494721816	0
212094_at	PEG10	1.3823965181601	0
209459_s_at	ABAT	1.37877997359864	0
212843_at	NCAM1	1.37691263947113	0
212741_at	MAOA	1.37588833807407	0
205358_at	GRIA2	1.37419155029011	0
220168_at	CASC1	1.37419018059172	0
203349_s_at	ETV5	1.37140384225998	0
201287_s_at	SDC1	1.36593265741364	0
209504_s_at	PLEKHB1	1.36354392874488	0
210674_s_at	PCDHA12	1.36229044957381	0
209343_at	EFHD1	1.36151759255523	0
207414_s_at	PCSK6	1.36049582389094	0
201505_at	LAMB1	1.35167791181131	0
205990_s_at	WNT5A	1.35096335880261	0
205549_at	PCP4	1.34413986528386	0
216733_s_at	GATM	1.34228713213273	0
204424_s_at	LMO3	1.33606115655716	0
203824_at	TSPAN8	1.33347329345505	0
209318_x_at	PLAGL1	1.33227120042402	0
209569_x_at	NSG1	1.33099260726798	0
208712_at	CCND1	1.3284652856854	0
202729_s_at	LTBP1	1.32726333216378	0
206772_at	PTH2R	1.32363274194346	0
219918_s_at	ASPM	1.31673017343576	0
205110_s_at	FGF13	1.31046578237238	0
211470_s_at	SULT1C2	1.3058661625416	0
206373_at	ZIC1	1.30069067463728	0
219463_at	LAMP5	1.29890384154727	0
201522_x_at	SNRPN	1.29620946989585	0
202718_at	IGFBP2	1.295742410843	0
202920_at	ANK2	1.29530934592214	0
212328_at	LIMCH1	1.29179542676488	0
221646_s_at	ZDHHC11	1.28931299484341	0
213456_at	SOSTDC1	1.28916283859836	0
204105_s_at	NRCAM	1.28660843700319	0
221884_at	MECOM	1.28150926413967	0
203764_at	DLGAP5	1.27921972132376	0
213194_at	ROBO1	1.27725276800983	0
204304_s_at	PROM1	1.27600781720918	0
213423_x_at	TUSC3	1.27482823550744	0
200953_s_at	CCND2	1.27458060923531	0
202668_at	EFNB2	1.2734697098921	0
203924_at	GSTA2	1.27303843193725	0
209642_at	BUB1	1.27290131058676	0
210074_at	CTSV	1.271949091613	0
204086_at	PRAME	1.26902401440266	0
212768_s_at	OLFM4	1.26511288581057	0
206805_at	SEMA3A	1.26398946670032	0
205541_s_at	GSPT2	1.26058748337764	0
209904_at	TNNC1	1.2601684256133	0
218876_at	TPPP3	1.25793941144778	0
221933_at	NLGN4X	1.25663224887676	0
207016_s_at	ALDH1A2	1.25655966247441	0
213422_s_at	MXRA8	1.25233281999211	0
220234_at	CA8	1.25085755768045	0
204042_at	WASF3	1.25030218098313	0
204984_at	GPC4	1.24711458375272	0
207981_s_at	ESRRG	1.24453560790906	0
205619_s_at	MEOX1	1.24363682823826	0
219230_at	TMEM100	1.2386440564647	0
219032_x_at	OPN3	1.23755098737026	0
213413_at	STON1	1.22933395573397	0
204548_at	STAR	1.22865818387047	0
203680_at	PRKAR2B	1.22698057713861	0
221558_s_at	LEF1	1.22473749133965	0
212224_at	ALDH1A1	1.22409753757105	0
221204_s_at	CRTAC1	1.2238314785041	0
210437_at	MAGEA9	1.22353516202509	0
209170_s_at	GPM6B	1.22133377310856	0
221950_at	EMX2	1.21829280748681	0
210377_at	ACSM3	1.21683039864637	0
204779_s_at	HOXB7	1.21468606999265	0
211538_s_at	HSPA2	1.21047966102676	0
204141_at	TUBB2A	1.20785767928724	0
208155_x_at	GAGE6	1.20640871143218	0
213325_at	NECTIN3	1.20494998467324	0
209699_x_at	AKR1C2	1.20427507772163	0
202709_at	FMOD	1.2024099208332	0
204822_at	TTK	1.20104086713588	0
220892_s_at	PSAT1	1.19709806158287	0
209598_at	PNMA2	1.19445875136612	0
219743_at	HEY2	1.19220819956592	0
209173_at	AGR2	1.18680667252093	0
206858_s_at	HOXC6	1.18646353958953	0
203961_at	NEBL	1.18193359383731	0.0208640360318591
212915_at	PDZRN3	1.18123854205778	0.0208640360318591
206987_x_at	FGF18	1.17941591006817	0.0208640360318591
202936_s_at	SOX9	1.17876335594666	0.0208640360318591
220316_at	NPAS3	1.17590955143139	0.0208640360318591
203408_s_at	SATB1	1.17586784087093	0.0208640360318591
202037_s_at	SFRP1	1.17546466671312	0.0208640360318591
211425_x_at	SSX4	1.17509241043403	0.0208640360318591
207245_at	UGT2B17	1.1750586060562	0.0208640360318591
219935_at	ADAMTS5	1.17386272776877	0.0208640360318591
210394_x_at	SSX4	1.17378681411759	0.0208640360318591
215599_at	SMA4	1.16335901819258	0.0208640360318591
217996_at	PHLDA1	1.16203997679679	0.0618368488727044
213122_at	TSPYL5	1.16042146179272	0.0618368488727044
207717_s_at	PKP2	1.16032899136583	0.0618368488727044
214390_s_at	BCAT1	1.15916078897838	0.0618368488727044
204931_at	TCF21	1.15193087753578	0.0618368488727044
210546_x_at	CTAG1B	1.15144814972482	0.0618368488727044
204162_at	NDC80	1.15067682439243	0.0618368488727044
212012_at	PXDN	1.14953695114949	0.0618368488727044
212865_s_at	COL14A1	1.1484496495489	0.0618368488727044
209291_at	ID4	1.14276043198818	0.0618368488727044
210145_at	PLA2G4A	1.13583260091688	0.122381584485382
217073_x_at	APOA1	1.13513537600194	0.122381584485382
206291_at	NTS	1.13438412740665	0.122381584485382
210445_at	FABP6	1.13417197581557	0.122381584485382
201250_s_at	SLC2A1	1.13170720953326	0.122381584485382
209656_s_at	TMEM47	1.12803355607087	0.122381584485382
204359_at	FLRT2	1.12787636277468	0.122381584485382
218499_at	STK26	1.12717236745946	0.122381584485382
214183_s_at	TKTL1	1.12651596695295	0.122381584485382
220591_s_at	EFHC2	1.12617010096283	0.122381584485382
210503_at	MAGEA11	1.12598626887312	0.122381584485382
205034_at	CCNE2	1.12499904004695	0.260877043775741
215016_x_at	DST	1.12084265944561	0.260877043775741
218625_at	NRN1	1.1182765292388	0.260877043775741
212190_at	SERPINE2	1.11699658496151	0.260877043775741
205626_s_at	CALB1	1.11600570047954	0.260877043775741
207149_at	CDH12	1.11550384088601	0.260877043775741
221577_x_at	GDF15	1.11425999251011	0.260877043775741
205350_at	CRABP1	1.11206638762472	0.260877043775741
219454_at	EGFL6	1.10974369937635	0.260877043775741
205862_at	GREB1	1.10971678740854	0.260877043775741
208891_at	DUSP6	1.10333130043817	0.524091903651221
215733_x_at	CTAG2	1.10226366346054	0.524091903651221
202007_at	NID1	1.10212209280436	0.524091903651221
209185_s_at	IRS2	1.10175842371867	0.524091903651221
204235_s_at	GULP1	1.10061294182329	0.524091903651221
202992_at	C7	1.09793680932587	0.524091903651221
209773_s_at	RRM2	1.0976556221555	0.524091903651221
218309_at	CAMK2N1	1.09393441102291	0.87727170048366
221185_s_at	IQCG	1.09068667337035	0.87727170048366
209550_at	NDN	1.0903425841604	0.87727170048366
204934_s_at	HPN	1.08916649177472	0.87727170048366
210347_s_at	BCL11A	1.08910953883311	0.87727170048366
211596_s_at	LRIG1	1.08900906131	0.87727170048366
214053_at	ERBB4	1.08819777179804	0.87727170048366
205366_s_at	HOXB6	1.08740394698403	0.87727170048366
219148_at	PBK	1.08657641713834	0.87727170048366
218804_at	ANO1	1.0865499888438	0.87727170048366
213385_at	CHN2	1.08409202764503	1.10987536306482
209160_at	AKR1C3	1.08357945405589	1.10987536306482
210387_at	NCALD	1.08258354575599	1.10987536306482
218755_at	KIF20A	1.08100071536747	1.10987536306482
205799_s_at	SLC3A1	1.06651012017198	1.93440469279888
203477_at	COL15A1	1.06409696512299	1.93440469279888
203510_at	MET	1.05707664685179	2.84389049794593
209822_s_at	VLDLR	1.05607058048221	2.84389049794593
214612_x_at	MAGEA6	1.05594238391122	2.84389049794593
214254_at	MAGEA4	1.05375696357969	2.84389049794593
206884_s_at	SCEL	1.05216588861682	2.84389049794593
219983_at	HRASLS	1.05132006712592	2.84389049794593
218326_s_at	LGR4	1.0503570665184	2.84389049794593
202350_s_at	MATN2	1.04921064858138	2.84389049794593
221690_s_at	NLRP2	1.04860557731873	2.84389049794593
205413_at	MPPED2	1.04857697239337	2.84389049794593
204751_x_at	DSC2	1.04851457615145	2.84389049794593
213479_at	NPTX2	1.04792303019759	2.84389049794593
204041_at	MAOB	1.0455577531028	3.49198835105044
210517_s_at	AKAP12	1.0435183113056	3.49198835105044
219789_at	NPR3	1.04001863170878	3.87766443771177
220940_at	ANKRD36B	1.03942700184627	3.87766443771177

## Sheet: Downregulated Genes
Table_SB4-B_Subtype3-C5.PRO
Probe	Gene	Fold Change	q-value(%)
209619_at	CD74	0.298828182752835	0
215193_x_at	HLA-DRB1	0.311864813392166	0
209312_x_at	HLA-DRB1	0.312104526704897	0
202748_at	GBP2	0.318052961548667	0
204070_at	RARRES3	0.319077726890077	0
211990_at	HLA-DPA1	0.329249574017649	0
208894_at	HLA-DRA	0.334328484401431	0
217767_at	C3	0.334514993292804	0
217478_s_at	HLA-DMA	0.338117880141387	0
204279_at	PSMB9	0.342590413127781	0
217995_at	SQRDL	0.350010099601544	0
202803_s_at	ITGB2	0.35291221307493	0
201721_s_at	LAPTM5	0.359208705632867	0
202237_at	NNMT	0.364166113274694	0
202357_s_at	CFB	0.373160370301594	0
202307_s_at	TAP1	0.381284023018992	0
203416_at	CD53	0.383954647876357	0
202902_s_at	CTSS	0.386823422460493	0
212998_x_at	HLA-DQB1	0.387680697097582	0
204122_at	TYROBP	0.388930653656258	0
205992_s_at	IL15	0.392941490936785	0
212531_at	LCN2	0.394146970118	0
203052_at	C2	0.395570576847976	0
204232_at	FCER1G	0.397602965561717	0
204446_s_at	ALOX5	0.398898233068405	0
202269_x_at	GBP1	0.401008460982363	0
216834_at	RGS1	0.402844452286372	0
219630_at	PDZK1IP1	0.403426640339594	0
211742_s_at	EVI2B	0.40346993359851	0
202688_at	TNFSF10	0.406327967955084	0
219684_at	RTP4	0.406337857041667	0
211656_x_at	HLA-DQB1	0.407696058788957	0
204533_at	CXCL10	0.408478888871901	0
204646_at	DPYD	0.409257995936781	0
201743_at	CD14	0.40933847496189	0
204774_at	EVI2A	0.411700673705519	0
212588_at	PTPRC	0.413107137451182	0
209546_s_at	APOL1	0.413184426569947	0
219209_at	IFIH1	0.413783198117987	0
202411_at	IFI27	0.415485655076247	0
213693_s_at	MUC1	0.418000739231027	0
201859_at	SRGN	0.419903337640868	0
204655_at	CCL5	0.42134022550786	0
204174_at	ALOX5AP	0.422707830247267	0
220330_s_at	SAMSN1	0.422924401222397	0
213566_at	RNASE6	0.423365624272567	0
203561_at	FCGR2A	0.423395613952866	0
210889_s_at	FCGR2B	0.426027833699722	0
219666_at	MS4A6A	0.426632219035358	0
218232_at	C1QA	0.430924253765372	0
205778_at	KLK7	0.433135432253785	0
204959_at	MNDA	0.434706811085971	0
209792_s_at	KLK10	0.440514526195755	0
203645_s_at	CD163	0.445598109533883	0
203923_s_at	CYBB	0.447138841756421	0
206125_s_at	KLK8	0.447627101771363	0
204205_at	APOBEC3G	0.448457455425771	0
209732_at	CLEC2B	0.451415831920891	0
220196_at	MUC16	0.454702095062582	0
211429_s_at	SERPINA1	0.454733733795649	0
208747_s_at	C1S	0.46311092827142	0
201141_at	GPNMB	0.466023022166561	0
206133_at	XAF1	0.472752650990073	0
216598_s_at	CCL2	0.473446515824826	0
210538_s_at	BIRC3	0.474109499355441	0
204787_at	VSIG4	0.475190097605548	0
215223_s_at	SOD2	0.475433582343945	0
202086_at	MX1	0.476077374487228	0
218322_s_at	ACSL5	0.478913012932976	0
209395_at	CHI3L1	0.482630467122288	0
206584_at	LY96	0.484188426666467	0
204834_at	FGL2	0.487599960651379	0
204972_at	OAS2	0.487831165081362	0
211796_s_at	IL23A	0.488060125762196	0
204747_at	IFIT3	0.488686944591463	0
202637_s_at	ICAM1	0.489987510620046	0
205419_at	GPR183	0.491038153446438	0
206082_at	HCP5	0.491850803320856	0
204416_x_at	APOC1	0.491894247884654	0
213975_s_at	LYZ	0.49235129646574	0
203932_at	HLA-DMB	0.495196744851817	0
201012_at	ANXA1	0.496780036239018	0
210029_at	IDO1	0.497627610870407	0
221872_at	RARRES1	0.499622331139211	0
202510_s_at	TNFAIP2	0.499838631934471	0
204846_at	CP	0.499885845488802	0
209230_s_at	NUPR1	0.50272085966256	0
202869_at	OAS1	0.504418668662387	0
209606_at	CYTIP	0.507007710314793	0
209875_s_at	SPP1	0.507152792374767	0
219607_s_at	MS4A4A	0.50742183766067	0
211122_s_at	CXCL11	0.507469698100427	0
203828_s_at	IL32	0.508663499722259	0
218986_s_at	DDX60	0.509065979819977	0
213797_at	RSAD2	0.511531522007648	0
208451_s_at	C4A	0.515353947201389	0
205668_at	LY75	0.515408456584329	0
208436_s_at	IRF7	0.516278298483547	0
204124_at	SLC34A2	0.51795673939102	0
203021_at	SLPI	0.519506204325451	0
32625_at	NPR1	0.523551991609158	0
212543_at	AIM1	0.525935197958571	0
212063_at	CD44	0.526156853313106	0
209795_at	CD69	0.52645292088879	0
218589_at	LPAR6	0.527364168763602	0
214038_at	CCL8	0.527575708508507	0
203571_s_at	ADIRF	0.528436624332795	0
217502_at	IFIT2	0.528822912344862	0
201506_at	TGFBI	0.529585719942505	0
212067_s_at	C1R	0.530797866198656	0
209436_at	SPON1	0.531740104996275	0
205945_at	IL6R	0.532592773752763	0
205479_s_at	PLAU	0.533567684363838	0
218963_s_at	KRT23	0.534647891489115	0
212192_at	KCTD12	0.53553549517391	0
204112_s_at	HNMT	0.535708809355116	0
212354_at	SULF1	0.536236912006617	0
218400_at	OAS3	0.536485122048568	0
201641_at	BST2	0.537168571844213	0
219768_at	VTCN1	0.538753427069243	0
202957_at	HCLS1	0.539277796880211	0
203868_s_at	VCAM1	0.539942006449844	0
210397_at	DEFB1	0.541274772397985	0
219352_at	HERC6	0.541301186330307	0
204439_at	IFI44L	0.542236975574127	0
217967_s_at	FAM129A	0.54225694794699	0
206697_s_at	HP	0.543963269300455	0
221530_s_at	BHLHE41	0.54501532059026	0
218943_s_at	DDX58	0.546073736143038	0
218723_s_at	RGCC	0.549058927845338	0
208470_s_at	HPR	0.549277585300919	0
203915_at	CXCL9	0.549663920951906	0
214453_s_at	IFI44	0.550295085268036	0
209183_s_at	C10orf10	0.551535906874188	0
203662_s_at	TMOD1	0.551736160627031	0
221563_at	DUSP10	0.553901197937643	0
219403_s_at	HPSE	0.554410160761998	0
214677_x_at	IGLJ3	0.554512847752228	0
206461_x_at	MT1H	0.55687229416618	0
205470_s_at	KLK11	0.55709524978435	0
216615_s_at	HTR3A	0.557141265122072	0
204733_at	KLK6	0.55837094441612	0
212473_s_at	MICAL2	0.558428200224417	0
218502_s_at	TRPS1	0.558507102733607	0
205890_s_at	UBD	0.562621433927822	0
209283_at	CRYAB	0.562731146014437	0
211456_x_at	MT1HL1	0.562734514421817	0
221671_x_at	IGKC	0.563744679256941	0
221760_at	MAN1A1	0.564981882589482	0
204745_x_at	MT1G	0.566301320633949	0
205569_at	LAMP3	0.566367431523707	0
210164_at	GZMB	0.566747820970581	0
205286_at	TFAP2C	0.568085247831326	0
219850_s_at	EHF	0.569401054730696	0
212859_x_at	MT1E	0.570153444929404	0
205483_s_at	ISG15	0.570504111737769	0
201348_at	GPX3	0.570890242797806	0
203153_at	IFIT1	0.574226904375553	0
212992_at	AHNAK2	0.575348601501655	0
206134_at	ADAMDEC1	0.575643444199304	0
205898_at	CX3CR1	0.575856105847755	0
209493_at	PDZD2	0.575995011896708	0
201785_at	RNASE1	0.576390869604146	0
205363_at	BBOX1	0.57693434967883	0
220979_s_at	ST6GALNAC5	0.578063621029788	0
202068_s_at	LDLR	0.579735549771485	0
214844_s_at	DOK5	0.579988691333246	0
211430_s_at	IGHG3	0.580491506502103	0
205542_at	STEAP1	0.586397659406447	0
204259_at	MMP7	0.587071286276078	0
212592_at	JCHAIN	0.587764735055073	0
204971_at	CSTA	0.588215248503747	0
205476_at	CCL20	0.58904673748745	0
213831_at	HLA-DQA1	0.589839136651328	0
202917_s_at	S100A8	0.590172972840878	0
201650_at	KRT19	0.591795601643786	0
206247_at	MICB	0.593363426868638	0
210519_s_at	NQO1	0.59476432235636	0
210096_at	CYP4B1	0.596330795024168	0
203083_at	THBS2	0.597349178350217	0
219836_at	ZBED2	0.600881311190413	0
204537_s_at	GABRE	0.60326911747067	0
202888_s_at	ANPEP	0.604172393655648	0
205334_at	S100A1	0.606389100971686	0
204885_s_at	MSLN	0.60696086787676	0
203708_at	PDE4B	0.610995745133753	0
201925_s_at	CD55	0.612682170581823	0
211026_s_at	MGLL	0.61322696646595	0
219440_at	RAI2	0.613465579767899	0
205590_at	RASGRP1	0.613967451811925	0
213800_at	CFH	0.614145520826305	0
205225_at	ESR1	0.614321893777119	0
208792_s_at	CLU	0.618363945933111	0
205242_at	CXCL13	0.6183789957495	0
205844_at	VNN1	0.619899474527979	0
204051_s_at	SFRP4	0.621134193027932	0
215388_s_at	CFHR1	0.621216539945345	0
211675_s_at	MDFIC	0.623551235133652	0
209016_s_at	KRT7	0.623597663512685	0
218677_at	S100A14	0.624100798381773	0
218435_at	DNAJC15	0.626790050917334	0
204942_s_at	ALDH3B2	0.626831738173421	0
205128_x_at	PTGS1	0.628441426030098	0
206008_at	TGM1	0.629802199453581	0
203936_s_at	MMP9	0.631922690317547	0
205941_s_at	COL10A1	0.632272181878203	0
220532_s_at	TMEM176B	0.634763803625569	0
203453_at	SCNN1A	0.634941269081129	0
207339_s_at	LTB	0.635508140735821	0
204470_at	CXCL1	0.635628577190134	0
201110_s_at	THBS1	0.637043526270821	0
203939_at	NT5E	0.6372490707892	0
206628_at	SLC5A1	0.637629559836821	0
203535_at	S100A9	0.639551845537378	0
204438_at	MRC1	0.641423713647525	0
203180_at	ALDH1A3	0.641499928018023	0
205568_at	AQP9	0.643283217046788	0
209278_s_at	TFPI2	0.643804866282503	0
209955_s_at	FAP	0.644475366093563	0
206025_s_at	TNFAIP6	0.645063127703014	0
202286_s_at	TACSTD2	0.64512776321362	0
218901_at	PLSCR4	0.646143535718755	0
209774_x_at	CXCL2	0.646705760009553	0
201042_at	TGM2	0.646897606582261	0
218960_at	TMPRSS4	0.649339080150867	0
202887_s_at	DDIT4	0.65015482751277	0
202283_at	SERPINF1	0.651231927510517	0
209621_s_at	PDLIM3	0.651310325753747	0
209498_at	CEACAM1	0.652616342363701	0
202489_s_at	FXYD3	0.652774146872582	0
204994_at	MX2	0.653001426928827	0
215946_x_at	IGLL3P	0.65396686091053	0
201952_at	ALCAM	0.654170466800277	0
209125_at	KRT6A	0.655163647181731	0
201631_s_at	IER3	0.655805298049292	0
211726_s_at	FMO2	0.656617937089826	0
216207_x_at	IGKV1D-13	0.656762847290649	0
205943_at	TDO2	0.656787193834748	0
202450_s_at	CTSK	0.65706911149525	0
217165_x_at	MT1F	0.658693730165535	0
215867_x_at	CA12	0.658730185461107	0
205975_s_at	HOXD1	0.659555366906996	0
210511_s_at	INHBA	0.66260143801168	0
219863_at	HERC5	0.662960552949212	0
217546_at	MT1M	0.663001142947217	0
219867_at	CHODL	0.663036516406226	0
208498_s_at	AMY1A	0.663688582553829	0
219857_at	PLEKHS1	0.663876678934917	0
218211_s_at	MLPH	0.664974156306453	0
206067_s_at	WT1	0.665028309916898	0
202859_x_at	CXCL8	0.665667564596783	0
208165_s_at	PRSS16	0.665837666952425	0
222242_s_at	KLK5	0.665983786779799	0
204099_at	SMARCD3	0.666830976208925	0
202856_s_at	SLC16A3	0.666951374171822	0
217378_x_at		0.668271372896072	0
202431_s_at	MYC	0.668857025764941	0
204437_s_at	FOLR1	0.669603386425555	0
213909_at	LRRC15	0.67068348634348	0
204159_at	CDKN2C	0.670846654567647	0
209047_at	AQP1	0.671271755519025	0
205081_at	CRIP1	0.671283336334909	0
205979_at	SCGB2A1	0.671714220916159	0
203305_at	F13A1	0.672160604210085	0
202376_at	SERPINA3	0.672670536542296	0
219759_at	ERAP2	0.672700126828628	0
218857_s_at	ASRGL1	0.673676247463017	0
203691_at	PI3	0.674178099366972	0
207109_at	POU2F3	0.674664123857477	0
200633_at	UBB	0.675681310351675	0
202436_s_at	CYP1B1	0.675855501466952	0
217480_x_at		0.676063595414533	0
210785_s_at	THEMIS2	0.679324238793963	0
206439_at	EPYC	0.680628134292961	0
219580_s_at	TMC5	0.682758273222433	0
214768_x_at	IGKC	0.684030924595183	0
204457_s_at	GAS1	0.684229212512995	0
209803_s_at	PHLDA2	0.685381896889279	0
203324_s_at	CAV2	0.685870563591019	0
209644_x_at	CDKN2A	0.68848440492075	0
221019_s_at	COLEC12	0.688918366445252	0
204415_at	IFI6	0.689662304060342	0
211597_s_at	HOPX	0.690141574975512	0
218858_at	DEPTOR	0.691011790920668	0
219274_at	TSPAN12	0.691327738315899	0
204197_s_at	RUNX3	0.692877742671408	0
221942_s_at	GUCY1A3	0.692939076077379	0
206859_s_at	PAEP	0.693328745461964	0
219476_at	C1orf116	0.695666959464054	0
210495_x_at	FN1	0.69858056109484	0
203878_s_at	MMP11	0.699411972278136	0
204083_s_at	TPM2	0.69974890718132	0
204187_at	GMPR	0.700069399221644	0
203074_at	ANXA8L1	0.701889276157139	0
202504_at	TRIM29	0.701903552316698	0
209921_at	SLC7A11	0.702031460437911	0
203382_s_at	APOE	0.703467800859077	0
219211_at	USP18	0.704241428259495	0
209189_at	FOS	0.704636668399405	0
218807_at	VAV3	0.704987765470116	0
210002_at	GATA6	0.706289369119833	0
210809_s_at	POSTN	0.708441292448174	0
200799_at	HSPA1A	0.708533063657033	0
209267_s_at	SLC39A8	0.708658074685433	0
213317_at	CLIC5	0.708846498478237	0
209351_at	KRT14	0.709145410673009	0
204622_x_at	NR4A2	0.711351905088807	0
213429_at	BICC1	0.711804857673526	0
201041_s_at	DUSP1	0.713992537681939	0
201694_s_at	EGR1	0.714162593138613	0
208396_s_at	PDE1A	0.714586174312946	0
209692_at	EYA2	0.715113059953472	0
213125_at	OLFML2B	0.715211936785839	0
205174_s_at	QPCT	0.71584786293227	0
204964_s_at	SSPN	0.716047787528168	0
201744_s_at	LUM	0.717669878507557	0
203854_at	CFI	0.718687451251128	0
203476_at	TPBG	0.719578013702435	0
218345_at	TMEM176A	0.719860059214558	0
209457_at	DUSP5	0.721519228213422	0
205597_at	SLC44A4	0.721872294182038	0
219959_at	MOCOS	0.722345515830194	0
205547_s_at	TAGLN	0.723002476030922	0
213790_at	ADAM12	0.724016932650362	0
37892_at	COL11A1	0.724586274167138	0
202157_s_at	CELF2	0.725658054924315	0
203726_s_at	LAMA3	0.725663801301685	0
205666_at	FMO1	0.725782323659729	0
206825_at	OXTR	0.725824240569547	0
210861_s_at	WISP3	0.726023982533643	0
212805_at	PRUNE2	0.727158816008577	0
204285_s_at	PMAIP1	0.727848441813628	0
209612_s_at	ADH1B	0.728071481952729	0
201893_x_at	DCN	0.728413467308137	0
209496_at	RARRES2	0.73038729770909	0
201431_s_at	DPYSL3	0.73065084749064	0
205267_at	POU2AF1	0.730894713343363	0
202627_s_at	SERPINE1	0.731909734010158	0
205969_at	AADAC	0.732006898063267	0
212774_at	ZBTB18	0.733826058739462	0
220332_at	CLDN16	0.733864815268679	0
204542_at	ST6GALNAC2	0.734039342684747	0
219153_s_at	THSD4	0.735460905947657	0
203240_at	FCGBP	0.735688528527596	0
204268_at	S100A2	0.735872254134103	0
221729_at	COL5A2	0.737177216831398	0
213338_at	TMEM158	0.738858567984337	0
203817_at	GUCY1B3	0.739011179383583	0
205899_at	CCNA1	0.739675508076699	0
201185_at	HTRA1	0.739723284583611	0
200974_at	ACTA2	0.740042264208224	0
203186_s_at	S100A4	0.740590492941236	0
204653_at	TFAP2A	0.741301297637258	0
204939_s_at	PLN	0.74198597255267	0
204393_s_at	ACPP	0.742749857909282	0
203066_at	CHST15	0.743424340942496	0
205249_at	EGR2	0.74411792986964	0
208250_s_at	DMBT1	0.744235474921969	0
202267_at	LAMC2	0.746082288638702	0
220177_s_at	TMPRSS3	0.746824157897468	0
205226_at	PDGFRL	0.746891143671785	0
201069_at	MMP2	0.746914534217527	0
206601_s_at	HOXD3	0.748345584711371	0
213017_at	ABHD3	0.748972569615643	0
202912_at	ADM	0.750572494933475	0
203397_s_at	GALNT3	0.750815066108394	0
205473_at	ATP6V1B1	0.751648499979382	0
209924_at	CCL18	0.752261793616003	0
204933_s_at	TNFRSF11B	0.753775864348154	0
209398_at	HIST1H1C	0.756337001111834	0
211709_s_at	CLEC11A	0.756414466440192	0
202202_s_at	LAMA4	0.757048405774155	0
213462_at	NPAS2	0.757557793864361	0
207175_at	ADIPOQ	0.757577366637229	0
219773_at	NOX4	0.75848711065007	0
202712_s_at	CKMT1B	0.758621107038357	0
205522_at	HOXD4	0.759350710492811	0
204464_s_at	EDNRA	0.759803427087	0
209651_at	TGFB1I1	0.761033362365655	0
202018_s_at	LTF	0.761879733787368	0
206100_at	CPM	0.763041924740729	0
201842_s_at	EFEMP1	0.76374296170178	0
221541_at	CRISPLD2	0.763987983749531	0
201438_at	COL6A3	0.766175434603242	0
214945_at	FAM153B	0.766739477741241	0
204620_s_at	VCAN	0.767097527927229	0
212909_at	LYPD1	0.767311166229865	0
204298_s_at	LOX	0.767377775756254	0
218854_at	DSE	0.767652679044822	0
212816_s_at	CBS	0.768399458828753	0
205316_at	SLC15A2	0.768949208069369	0
209911_x_at	HIST1H2BD	0.769118999324774	0
204135_at	FILIP1L	0.770126696176696	0
209758_s_at	MFAP5	0.771381494360824	0
202388_at	RGS2	0.77163384663529	0
218469_at	GREM1	0.772942204504216	0
211748_x_at	PTGDS	0.773494802122961	0
203196_at	ABCC4	0.774228094388104	0
219087_at	ASPN	0.774830264830902	0
210139_s_at	PMP22	0.775071415062861	0
212097_at	CAV1	0.77522280156983	0
207802_at	CRISP3	0.775696227920487	0
204836_at	GLDC	0.775859257196312	0
208131_s_at	PTGIS	0.776067339257496	0
205239_at	AREG	0.776140669916829	0
201667_at	GJA1	0.776787903430211	0
206101_at	ECM2	0.781043578906689	0
205567_at	CHST1	0.781503846296713	0
219956_at	GALNT6	0.782514143422215	0
203980_at	FABP4	0.783832243264474	0
203892_at	WFDC2	0.784730292669186	0
204337_at	RGS4	0.78598448444566	0
203549_s_at	LPL	0.786128669506801	0
203060_s_at	PAPSS2	0.786777282704269	0
218736_s_at	PALMD	0.786988146205318	0
205043_at	CFTR	0.788266609204835	0
217744_s_at	PERP	0.789138348093461	0
222162_s_at	ADAMTS1	0.789255754841556	0
202620_s_at	PLOD2	0.789297644726902	0
211564_s_at	PDLIM4	0.789916450090674	0
205432_at	OVGP1	0.790299131767442	0
209687_at	CXCL12	0.790483764311794	0
218692_at	SYBU	0.790611144788751	0
204580_at	MMP12	0.791889709901165	0
202310_s_at	COL1A1	0.792920137940089	0
206227_at	CILP	0.792997274066667	0
215071_s_at	HIST1H2AC	0.793121604065491	0
212488_at	COL5A1	0.793695539452863	0
220230_s_at	CYB5R2	0.794891396495204	0
203903_s_at	HEPH	0.798170330766867	0
202766_s_at	FBN1	0.799665538842185	0
207808_s_at	PROS1	0.799827555151665	0
209373_at	MALL	0.800510697588458	0
217028_at	CXCR4	0.801266324968958	0
222108_at	AMIGO2	0.801367542179776	0
205044_at	GABRP	0.802596527527728	0
202524_s_at	SPOCK2	0.809111477293845	0
201792_at	AEBP1	0.809183858730387	0
205830_at	CLGN	0.810955430306474	0
203789_s_at	SEMA3C	0.81340946799076	0
213094_at	ADGRG6	0.813417101835716	0
202768_at	FOSB	0.81430991498758	0
214290_s_at	HIST2H2AA3	0.814377078638747	0
211712_s_at	ANXA9	0.816922040880522	0
201131_s_at	CDH1	0.817473112334028	0
203108_at	GPRC5A	0.817657324472368	0
209270_at	LAMB3	0.817972848409571	0
207173_x_at	CDH11	0.818296098173113	0
209487_at	RBPMS	0.818386982780683	0
215076_s_at	COL3A1	0.81906970388465	0
206336_at	CXCL6	0.819577123154352	0
214803_at	CDH6	0.821062833849856	0
209781_s_at	KHDRBS3	0.821697599292553	0
202454_s_at	ERBB3	0.821783173954982	0
206115_at	EGR3	0.821969560284728	0
211685_s_at	NCALD	0.822453281504833	0
219215_s_at	SLC39A4	0.822503343160493	0
205997_at	ADAM28	0.823508152680607	0
219985_at	HS3ST3A1	0.824451670688747	0
214455_at	HIST1H2BC	0.824854593278205	0
203131_at	PDGFRA	0.825009304536675	0
207191_s_at	ISLR	0.825964354047005	0
202274_at	ACTG2	0.827014895387818	0

## Sheet: Top 20 Upregulated Pathways
Table_SB4-C_Subtype3-C5.PRO
Gene Set Name	Description	# Genes in Gene Set (K)	# Genes in Overlap (k)	k/K	p-value	FDR q-value
NABA_MATRISOME	Ensemble of genes encoding extracellular matrix and extracellular matrix-associated proteins	1028	40	0.0389	4.21e-22	5.59e-19
NABA_CORE_MATRISOME	Ensemble of genes encoding core extracellular matrix including ECM glycoproteins, collagens and proteoglycans	275	20	0.0727	1.27e-16	8.47e-14
KEGG_PATHWAYS_IN_CANCER	Pathways in cancer	328	18	0.0549	5.53e-13	2.45e-10
WNT_SIGNALING	Genes related to Wnt-mediated signal transduction	89	11	0.1236	3.08e-12	9.39e-10
KEGG_WNT_SIGNALING_PATHWAY	Wnt signaling pathway	151	13	0.0861	3.53e-12	9.39e-10
PID_SYNDECAN_1_PATHWAY	Syndecan-1-mediated signaling events	46	8	0.1739	1.75e-10	3.88e-08
KEGG_MELANOGENESIS	Melanogenesis	102	10	0.098	3.16e-10	5.99e-08
KEGG_BASAL_CELL_CARCINOMA	Basal cell carcinoma	55	8	0.1455	7.83e-10	1.16e-07
PID_FGF_PATHWAY	FGF signaling pathway	55	8	0.1455	7.83e-10	1.16e-07
NABA_ECM_GLYCOPROTEINS	Genes encoding structural ECM glycoproteins	196	12	0.0612	1.27e-09	1.69e-07
PID_AVB3_INTEGRIN_PATHWAY	Integrins in angiogenesis	75	8	0.1067	9.85e-09	1.19e-06
NABA_MATRISOME_ASSOCIATED	Ensemble of genes encoding ECM-associated proteins including ECM-affilaited proteins, ECM regulators and secreted factors	753	20	0.0266	1.08e-08	1.2e-06
REACTOME_DEVELOPMENTAL_BIOLOGY	Genes involved in Developmental Biology	396	14	0.0354	5.95e-08	6.08e-06
NABA_COLLAGENS	Genes encoding collagen proteins	44	6	0.1364	1.63e-07	1.55e-05
REACTOME_AXON_GUIDANCE	Genes involved in Axon guidance	251	11	0.0438	1.92e-07	1.7e-05
PID_WNT_SIGNALING_PATHWAY	Wnt signaling network	28	5	0.1786	4.48e-07	3.72e-05
REACTOME_CLASS_B_2_SECRETIN_FAMILY_RECEPTORS	Genes involved in Class B/2 (Secretin family receptors)	88	7	0.0795	6.46e-07	5.05e-05
REACTOME_COLLAGEN_FORMATION	Genes involved in Collagen formation	58	6	0.1034	8.75e-07	6.46e-05
REACTOME_NCAM1_INTERACTIONS	Genes involved in NCAM1 interactions	39	5	0.1282	2.5e-06	0.000175
NABA_SECRETED_FACTORS	Genes encoding secreted soluble factors	344	11	0.032	4.16e-06	0.000265

## Sheet: Genes in Upregulated Pathways
Table_SB4-D_Subtype3-C5.PRO
Pathway	Genes Upregulated in Pathway
NABA_MATRISOME	ADAMTS5	BMP7	COCH	COL14A1	COL15A1	COL2A1	COL4A5	COL9A2	COL9A3	COLEC11	EGFL6	FBN2	FGF13	FGF18	FGF9	FMOD	FRZB	GDF15	GPC3	GPC4	IGF2	IGFBP2	IGFBP5	LAMB1	LTBP1	MATN2	MDK	MFAP2	MFAP4	NID1	PCSK6	PXDN	SDC1	SDC2	SEMA3A	SERPINE2	SFRP1	SLIT2	SPOCK1	WNT5A
NABA_CORE_MATRISOME	COCH	COL14A1	COL15A1	COL2A1	COL4A5	COL9A2	COL9A3	FBN2	FMOD	IGFBP2	IGFBP5	LAMB1	LTBP1	MATN2	MFAP2	MFAP4	NID1	PXDN	SLIT2	SPOCK1
KEGG_PATHWAYS_IN_CANCER	CCND1	CCNE2	FGF13	FGF18	FGF9	FGFR3	FZD10	FZD2	FZD3	FZD5	FZD7	LAMB1	LEF1	MECOM	MET	SLC2A1	TCF7L1	WNT5A
WNT_SIGNALING	CCND1	CCND2	FRZB	FZD2	FZD3	FZD5	FZD7	LEF1	SFRP1	TCF7L1	WNT5A
KEGG_WNT_SIGNALING_PATHWAY	CCND1	CCND2	FZD10	FZD2	FZD3	FZD5	FZD7	LEF1	PLCB1	PLCB4	SFRP1	TCF7L1	WNT5A
PID_SYNDECAN_1_PATHWAY	COL14A1	COL15A1	COL2A1	COL4A5	COL9A2	COL9A3	MET	SDC1
KEGG_MELANOGENESIS	FZD10	FZD2	FZD3	FZD5	FZD7	LEF1	PLCB1	PLCB4	TCF7L1	WNT5A
KEGG_BASAL_CELL_CARCINOMA	FZD10	FZD2	FZD3	FZD5	FZD7	LEF1	TCF7L1	WNT5A
PID_FGF_PATHWAY	CDH2	FGF18	FGF9	FGFR3	MET	NCAM1	SDC2	SPRY2
NABA_ECM_GLYCOPROTEINS	COCH	FBN2	IGFBP2	IGFBP5	LAMB1	LTBP1	MATN2	MFAP2	MFAP4	NID1	PXDN	SLIT2
PID_AVB3_INTEGRIN_PATHWAY	COL14A1	COL15A1	COL2A1	COL4A5	COL9A2	COL9A3	IRS1	SDC1
NABA_MATRISOME_ASSOCIATED	ADAMTS5	BMP7	COLEC11	EGFL6	FGF13	FGF18	FGF9	FRZB	GDF15	GPC3	GPC4	IGF2	MDK	PCSK6	SDC1	SDC2	SEMA3A	SERPINE2	SFRP1	WNT5A
REACTOME_DEVELOPMENTAL_BIOLOGY	CDH2	COL2A1	COL4A5	COL9A2	COL9A3	LAMB1	MET	NCAM1	NR2F2	NRCAM	PCSK6	ROBO1	SEMA3A	SLIT2
NABA_COLLAGENS	COL14A1	COL15A1	COL2A1	COL4A5	COL9A2	COL9A3
REACTOME_AXON_GUIDANCE	COL2A1	COL4A5	COL9A2	COL9A3	LAMB1	MET	NCAM1	NRCAM	ROBO1	SEMA3A	SLIT2
PID_WNT_SIGNALING_PATHWAY	FZD10	FZD2	FZD5	FZD7	WNT5A
REACTOME_CLASS_B_2_SECRETIN_FAMILY_RECEPTORS	FZD10	FZD2	FZD3	FZD5	FZD7	PTH2R	WNT5A
REACTOME_COLLAGEN_FORMATION	COL14A1	COL15A1	COL2A1	COL4A5	COL9A2	COL9A3
REACTOME_NCAM1_INTERACTIONS	COL2A1	COL4A5	COL9A2	COL9A3	NCAM1
NABA_SECRETED_FACTORS	BMP7	EGFL6	FGF13	FGF18	FGF9	FRZB	GDF15	IGF2	MDK	SFRP1	WNT5A

## Sheet: Top 20 Downregulated Pathways
Table_SB4-E_Subtype3-C5.PRO
Gene Set Name	Description	# Genes in Gene Set (K)	# Genes in Overlap (k)	k/K	p-value	FDR q-value
NABA_MATRISOME	Ensemble of genes encoding extracellular matrix and extracellular matrix-associated proteins	1028	104	0.1012	2.16e-73	2.87e-70
NABA_MATRISOME_ASSOCIATED	Ensemble of genes encoding ECM-associated proteins including ECM-affilaited proteins, ECM regulators and secreted factors	753	66	0.0876	4.08e-42	2.71e-39
NABA_CORE_MATRISOME	Ensemble of genes encoding core extracellular matrix including ECM glycoproteins, collagens and proteoglycans	275	38	0.1382	7.38e-32	3.27e-29
REACTOME_IMMUNE_SYSTEM	Genes involved in Immune System	933	57	0.0611	3.64e-28	1.21e-25
PID_INTEGRIN1_PATHWAY	Beta1 integrin cell surface interactions	66	21	0.3182	2.39e-26	6.36e-24
REACTOME_INTERFERON_SIGNALING	Genes involved in Interferon Signaling	159	25	0.1572	8.68e-23	1.92e-20
NABA_ECM_REGULATORS	Genes encoding enzymes and their regulators involved in the remodeling of the extracellular matrix	238	27	0.1134	1.14e-20	2.17e-18
NABA_ECM_GLYCOPROTEINS	Genes encoding structural ECM glycoproteins	196	24	0.1224	2.68e-19	4.45e-17
REACTOME_INTERFERON_ALPHA_BETA_SIGNALING	Genes involved in Interferon alpha/beta signaling	64	16	0.25	1.74e-18	2.57e-16
REACTOME_CYTOKINE_SIGNALING_IN_IMMUNE_SYSTEM	Genes involved in Cytokine Signaling in Immune system	270	26	0.0963	3.7e-18	4.92e-16
NABA_SECRETED_FACTORS	Genes encoding secreted soluble factors	344	27	0.0785	1.5e-16	1.81e-14
KEGG_COMPLEMENT_AND_COAGULATION_CASCADES	Complement and coagulation cascades	69	15	0.2174	2.02e-16	2.17e-14
KEGG_SYSTEMIC_LUPUS_ERYTHEMATOSUS	Systemic lupus erythematosus	140	19	0.1357	2.12e-16	2.17e-14
REACTOME_CHEMOKINE_RECEPTORS_BIND_CHEMOKINES	Genes involved in Chemokine receptors bind chemokines	57	14	0.2456	3.19e-16	3.03e-14
KEGG_CYTOKINE_CYTOKINE_RECEPTOR_INTERACTION	Cytokine-cytokine receptor interaction	267	24	0.0899	3.54e-16	3.13e-14
KEGG_ECM_RECEPTOR_INTERACTION	ECM-receptor interaction	84	15	0.1786	4.63e-15	3.84e-13
REACTOME_INNATE_IMMUNE_SYSTEM	Genes involved in Innate Immune System	279	22	0.0789	9.09e-14	7.11e-12
KEGG_FOCAL_ADHESION	Focal adhesion	201	19	0.0945	1.77e-13	1.28e-11
PID_AP1_PATHWAY	AP-1 transcription factor network	70	13	0.1857	1.83e-13	1.28e-11
REACTOME_REGULATION_OF_COMPLEMENT_CASCADE	Genes involved in Regulation of Complement cascade	14	8	0.5714	2.27e-13	1.51e-11

## Sheet: Genes in Downregulated Pathways
Table_SB4-F_Subtype3-C5.PRO
Pathway	Genes Downregulated in Pathway
NABA_MATRISOME	ADAM12	ADAM28	ADAMDEC1	ADAMTS1	ADIPOQ	AEBP1	ANXA1	ANXA8L1	ANXA9	AREG	ASPN	C1QA	CCL18	CCL2	CCL20	CCL5	CCL8	CILP	CLEC11A	CLEC2B	COL10A1	COL11A1	COL1A1	COL3A1	COL5A1	COL5A2	COL6A3	COLEC12	CRISPLD2	CSTA	CTSK	CTSS	CXCL1	CXCL10	CXCL11	CXCL12	CXCL13	CXCL2	CXCL6	CXCL9	DCN	DMBT1	ECM2	EFEMP1	EPYC	F13A1	FBN1	FGL2	FN1
NABA_MATRISOME_ASSOCIATED	ADAM12	ADAM28	ADAMDEC1	ADAMTS1	ANXA1	ANXA8L1	ANXA9	AREG	C1QA	CCL18	CCL2	CCL20	CCL5	CCL8	CLEC11A	CLEC2B	COLEC12	CSTA	CTSK	CTSS	CXCL1	CXCL10	CXCL11	CXCL12	CXCL13	CXCL2	CXCL6	CXCL9	F13A1	GREM1	HPSE	HTRA1	IL15	IL23A	IL8	INHBA	LOX	LTB	MMP11	MMP12	MMP2	MMP7	MMP9	MUC1	MUC16	OVGP1	PI3	PLAU	PLOD2
NABA_CORE_MATRISOME	ADIPOQ	AEBP1	ASPN	CILP	COL10A1	COL11A1	COL1A1	COL3A1	COL5A1	COL5A2	COL6A3	CRISPLD2	DCN	DMBT1	ECM2	EFEMP1	EPYC	FBN1	FGL2	FN1	LAMA3	LAMA4	LAMB3	LAMC2	LUM	MFAP5	POSTN	SPOCK2	SPON1	SPP1	SRGN	TGFBI	THBS1	THBS2	THSD4	TNFAIP6	VCAN	WISP3
REACTOME_IMMUNE_SYSTEM	BIRC3	C1QA	C1S	C2	C3	C4A	CD14	CD44	CD55	CD74	CDH1	CFB	CFH	CFI	CTSK	CTSS	CYBB	DDX58	DEFB1	EGR1	FCGR2B	FOS	GBP1	GBP2	HERC5	HLA-DMA	HLA-DMB	HLA-DPA1	HLA-DQA1	HLA-DRB1	ICAM1	IFI27	IFI6	IFIH1	IFIT1	IFIT2	IFIT3	IL6R	IRF7	ISG15	ITGB2	LY96	MRC1	MX1	MX2	OAS1	OAS2	OAS3	PROS1
PID_INTEGRIN1_PATHWAY	CD14	COL11A1	COL1A1	COL3A1	COL5A1	COL5A2	COL6A3	F13A1	FBN1	FN1	LAMA3	LAMA4	LAMB3	LAMC2	PLAU	SPP1	TGFBI	TGM2	THBS1	THBS2	VCAM1
REACTOME_INTERFERON_SIGNALING	CD44	DDX58	EGR1	GBP1	GBP2	HERC5	HLA-DPA1	HLA-DQA1	HLA-DRB1	ICAM1	IFI27	IFI6	IFIT1	IFIT2	IFIT3	IRF7	ISG15	MX1	MX2	OAS1	OAS2	OAS3	USP18	VCAM1	XAF1
NABA_ECM_REGULATORS	ADAM12	ADAM28	ADAMDEC1	ADAMTS1	CSTA	CTSK	CTSS	F13A1	HPSE	HTRA1	LOX	MMP11	MMP12	MMP2	MMP7	MMP9	PI3	PLAU	PLOD2	SERPINA1	SERPINA3	SERPINE1	SERPINF1	SLPI	SULF1	TGM1	TGM2
NABA_ECM_GLYCOPROTEINS	ADIPOQ	AEBP1	CILP	CRISPLD2	DMBT1	ECM2	EFEMP1	FBN1	FGL2	FN1	LAMA3	LAMA4	LAMB3	LAMC2	MFAP5	POSTN	SPON1	SPP1	TGFBI	THBS1	THBS2	THSD4	TNFAIP6	WISP3
REACTOME_INTERFERON_ALPHA_BETA_SIGNALING	EGR1	GBP2	IFI27	IFI6	IFIT1	IFIT2	IFIT3	IRF7	ISG15	MX1	MX2	OAS1	OAS2	OAS3	USP18	XAF1
REACTOME_CYTOKINE_SIGNALING_IN_IMMUNE_SYSTEM	CD44	DDX58	EGR1	GBP1	GBP2	HERC5	HLA-DPA1	HLA-DQA1	HLA-DRB1	ICAM1	IFI27	IFI6	IFIT1	IFIT2	IFIT3	IL6R	IRF7	ISG15	MX1	MX2	OAS1	OAS2	OAS3	USP18	VCAM1	XAF1
NABA_SECRETED_FACTORS	AREG	CCL18	CCL2	CCL20	CCL5	CCL8	CXCL1	CXCL10	CXCL11	CXCL12	CXCL13	CXCL2	CXCL6	CXCL9	IL15	IL23A	IL8	INHBA	LTB	S100A1	S100A14	S100A2	S100A4	S100A8	S100A9	SFRP4	TNFSF10
KEGG_COMPLEMENT_AND_COAGULATION_CASCADES	C1QA	C1R	C1S	C2	C3	C4A	CD55	CFB	CFH	CFI	F13A1	PLAU	PROS1	SERPINA1	SERPINE1
KEGG_SYSTEMIC_LUPUS_ERYTHEMATOSUS	C1QA	C1R	C1S	C2	C3	C4A	FCGR2A	FCGR2B	HIST1H2AC	HIST1H2BC	HIST1H2BD	HIST2H2AA3	HLA-DMA	HLA-DMB	HLA-DPA1	HLA-DQA1	HLA-DQB1	HLA-DRA	HLA-DRB1
REACTOME_CHEMOKINE_RECEPTORS_BIND_CHEMOKINES	CCL2	CCL20	CCL5	CX3CR1	CXCL1	CXCL10	CXCL11	CXCL12	CXCL13	CXCL2	CXCL6	CXCL9	CXCR4	IL8
KEGG_CYTOKINE_CYTOKINE_RECEPTOR_INTERACTION	CCL18	CCL2	CCL20	CCL5	CCL8	CX3CR1	CXCL1	CXCL10	CXCL11	CXCL12	CXCL13	CXCL2	CXCL6	CXCL9	CXCR4	IL15	IL23A	IL6R	IL8	INHBA	LTB	PDGFRA	TNFRSF11B	TNFSF10
KEGG_ECM_RECEPTOR_INTERACTION	CD44	COL11A1	COL1A1	COL3A1	COL5A1	COL5A2	COL6A3	FN1	LAMA3	LAMA4	LAMB3	LAMC2	SPP1	THBS1	THBS2
REACTOME_INNATE_IMMUNE_SYSTEM	BIRC3	C1QA	C1S	C2	C3	C4A	CD14	CD55	CFB	CFH	CFI	CTSK	CTSS	DDX58	DEFB1	FOS	HERC5	IFIH1	IRF7	ISG15	LY96	PROS1
KEGG_FOCAL_ADHESION	BIRC3	CAV1	CAV2	COL11A1	COL1A1	COL3A1	COL5A1	COL5A2	COL6A3	FN1	LAMA3	LAMA4	LAMB3	LAMC2	PDGFRA	SPP1	THBS1	THBS2	VAV3
PID_AP1_PATHWAY	CCL2	CDKN2A	DUSP1	EGR1	ESR1	FABP4	FOS	FOSB	GJA1	IL8	MMP9	MYC	PLAU
REACTOME_REGULATION_OF_COMPLEMENT_CASCADE	C2	C3	C4A	CD55	CFB	CFH	CFI	PROS1
[truncated: 55 more columns]
